# Supplementary material
Source: Royal Society of Chemistry journal article supplement (doi:10.1039/d6cy00127k)
Supplement: d6cy00127k1.pdf [file d6cy00127k1.pdf]

### Supporting Information

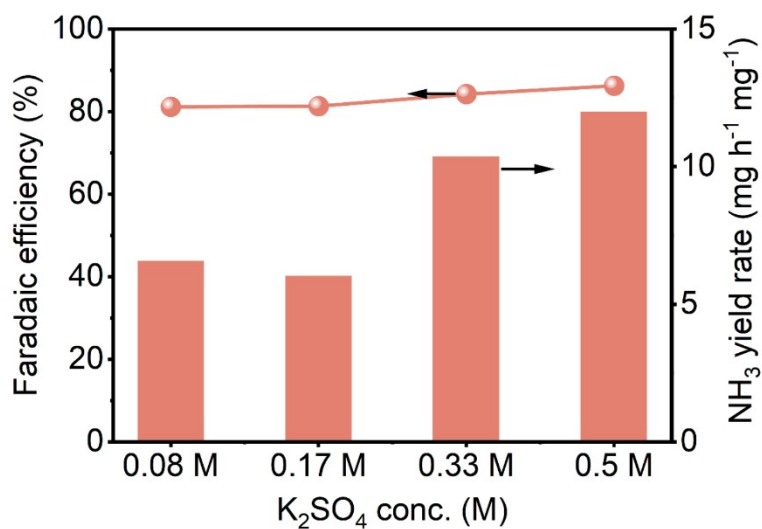

**Fig. S1** Effect of K<sub>2</sub>SO<sub>4</sub> concentration on the Faradaic efficiency of SNC catalyst under neutral pH conditions. The performance shows gradual improvement with increasing electrolyte concentration, reaching 86.2% FE at 0.5 M K<sub>2</sub>SO<sub>4</sub>, which demonstrates the catalyst's adaptability under different pH environments. Higher concentrations (0.08-0.5 M) show further enhancement, indicating that the catalyst maintains good activity even under high ionic strength conditions.

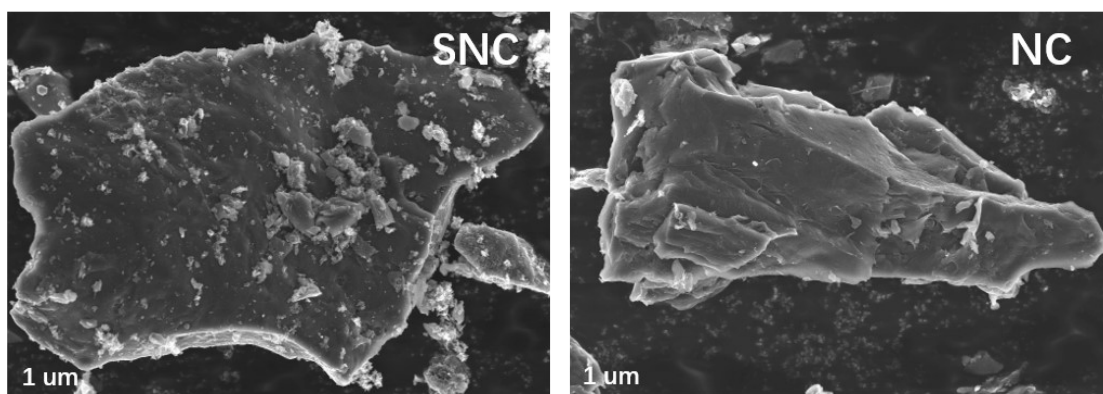

**Fig. S2** SEM of SNC and NC catalysts.

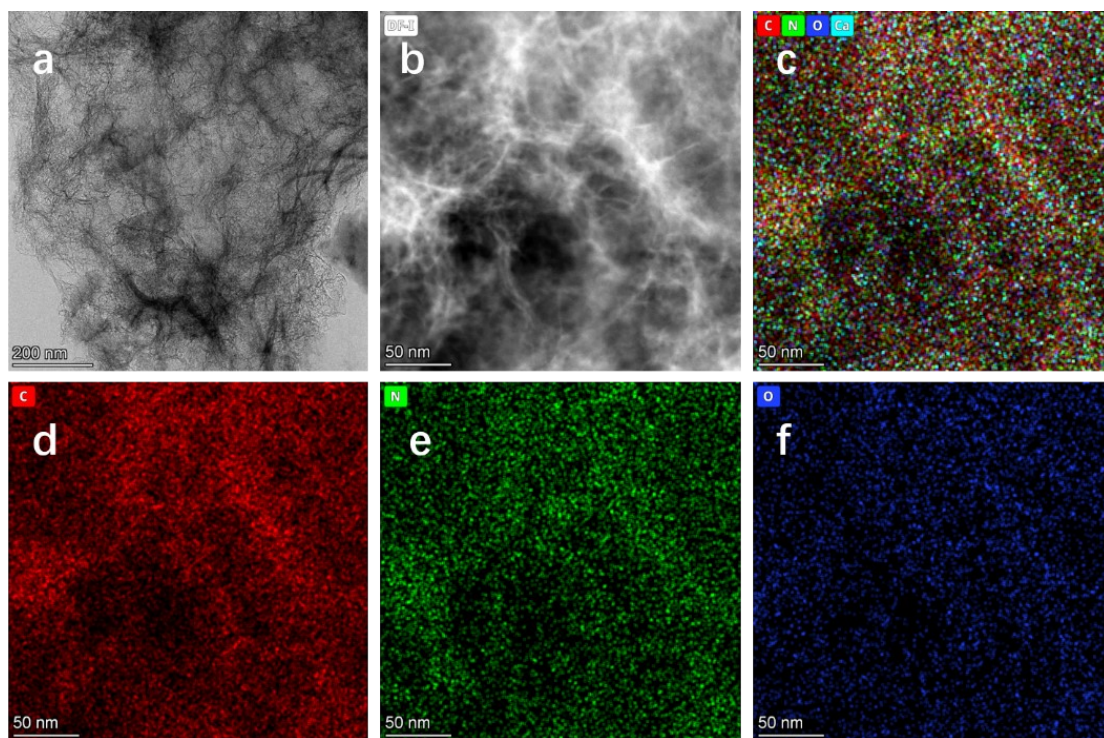

Fig. S3 HRTEM and EDS mapping of NC.

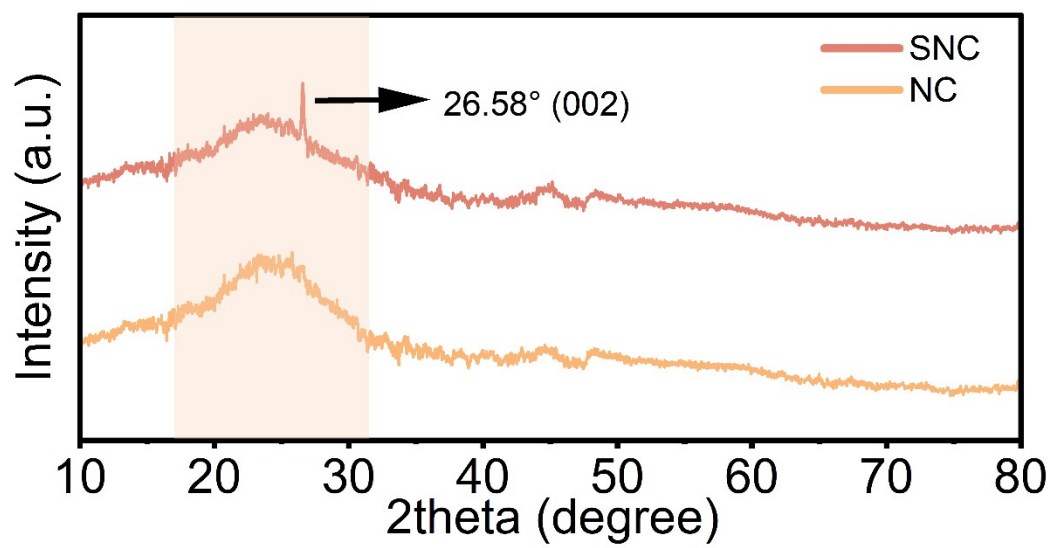

Fig. S4 XRD of SNC and NC.

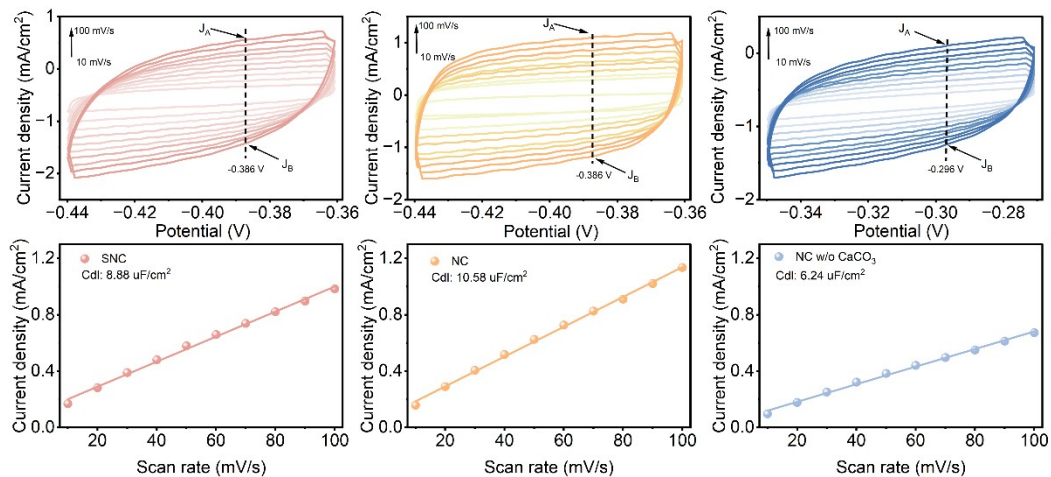

**Fig. S5** CV for the determination of ECSA. (a–c) CV in the non-Faradaic region, and (d–f) capacitive current differences,  $(J_A - J_B)/2$ , as a function of the CV scan rates in (a, d) SNC (b, e) NC, and (c, f) NC w/o  $\text{CaCO}_3$

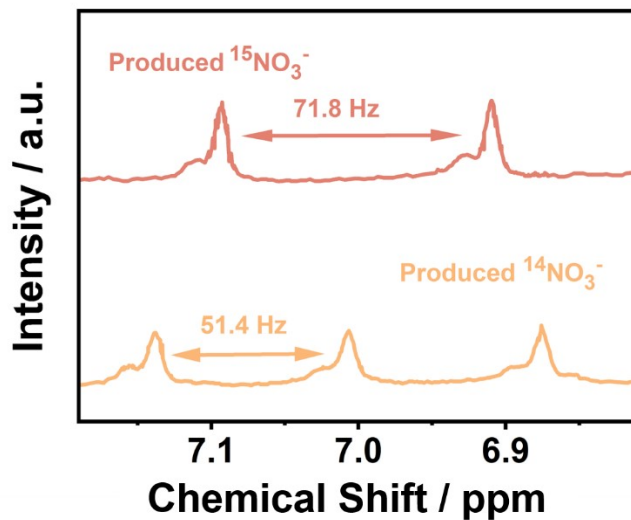

**Fig. S6**  $^1\text{H}$  NMR test of produced ammonia using  $\text{K}^{14}\text{NO}_3$  and  $\text{K}^{15}\text{NO}_3$  as nitrogen sources.

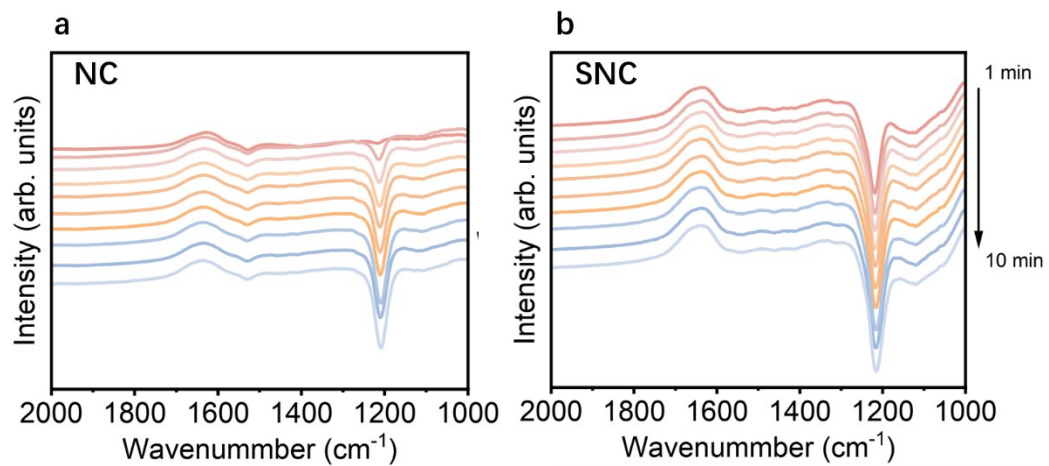

Fig. S7 Time-dependent in situ ATR-FTIR spectra of SNC and NC.

**Table S1.** Chemical compositions of samples characterised via XPS

| Samples                 | Elements | States                  | Percentages (%) |
|-------------------------|----------|-------------------------|-----------------|
| SNC                     | C1s      | C-C / C=C               | 66.0            |
|                         |          | C-N                     | 22.3            |
|                         |          | C=O                     | 6.8             |
|                         |          | O-C=O                   | 4.9             |
|                         | N1s      | Pyridinic N             | 38.6            |
|                         |          | Pyrolic N               | 34.2            |
|                         |          | Graphitic N             | 20.3            |
|                         |          | Oxidized N              | 6.9             |
|                         | O1s      | C=O                     | 24.3            |
|                         |          | C-OH                    | 45.7            |
|                         |          | C-COOH                  | 30.0            |
|                         | S2p      | C-S-C 2p3/2             | 24.8            |
|                         |          | C-S-C 2p1/2             | 12.5            |
|                         |          | C-SO <sub>x</sub> 2p3/2 | 41.7            |
| C-SO <sub>x</sub> 2p1/2 |          | 21                      |                 |
| NC                      | C1s      | C-C / C=C               | 66.5            |
|                         |          | C-N                     | 21.4            |
|                         |          | C=O                     | 6.6             |
|                         |          | O-C=O                   | 5.5             |
|                         | N1s      | Pyridinic N             | 35.7            |

|     |             |      |
|-----|-------------|------|
|     | Pyrrolic N  | 40.4 |
|     | Graphitic N | 17.4 |
|     | Oxidized N  | 6.5  |
| O1s | C=O         | 24.5 |
|     | C-OH        | 47.6 |
|     | C-COOH      | 27.9 |

**Table S2.** Physicochemical Properties of SNC, NC, and C-ref

| Samples                  | BET Surface Area<br>(m <sup>2</sup> g <sup>-1</sup> ) | BJH cumulative pore<br>volume (1.7-300 nm)<br>(cm <sup>3</sup> g <sup>-1</sup> ) | BJH average pore<br>diameter (4V/A) (nm) |
|--------------------------|-------------------------------------------------------|----------------------------------------------------------------------------------|------------------------------------------|
| SNC                      | 9.9715                                                | 0.058921                                                                         | 25.5056                                  |
| NC                       | 15.6871                                               | 0.041844                                                                         | 10.5208                                  |
| NC w/o CaCO <sub>3</sub> | 4.0267                                                | 0.015620                                                                         | 15.2111                                  |

**Table S3**

| Experimental condition                                   | FE (%) |
|----------------------------------------------------------|--------|
| Without Nitrate (Only N <sub>2</sub> -saturated 1 M KOH) | 5.4    |
| Open Circuit Potential (OCP)                             | 0      |
| Without Catalyst (Bare Carbon Paper)                     | 6.1    |
